# Supplementary material for: Role of the Indian Ocean basin mode in driving the interdecadal variations of summer precipitation over the East Asian monsoon boundary zone
Source: Copernicus journal article supplement (doi:10.5194/acp-24-5099-2024), 2024-04-30
Supplement: Supplementary file 1 [file acp-24-5099-2024-supplement.pdf]

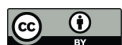

*Supplement of*

**Role of the Indian Ocean basin mode in driving the interdecadal variations of summer precipitation over the East Asian monsoon boundary zone**

**Jing Wang et al.**

*Correspondence to:* Yanju Liu (liuyanjan@cma.gov.cn)

The copyright of individual parts of the supplement might differ from the article licence.

## Glossary of acronyms

|             |                                                              |
|-------------|--------------------------------------------------------------|
| 20CRv2c     | Twentieth Century Reanalysis version 2c                      |
| CESM1       | Community Earth System Model version 1                       |
| CESM1_IOPES | CESM1 Indian Ocean Pacemaker Ensemble Simulation             |
| CESM1_LENS  | CESM1 Large Ensemble Numerical Simulation                    |
| CIRES       | Cooperative Institute for Research in Environmental Sciences |
| CRU         | Climatic Research Unit                                       |
| EAMBZ       | East Asian monsoon boundary zone                             |
| EASM        | East Asian summer monsoon                                    |
| EOF         | Empirical orthogonal function                                |
| ERSSTv5     | Extended Reconstructed sea surface temperature version 5     |
| IOBM        | Indian Ocean basin mode                                      |
| IPO         | Interdecadal Pacific oscillation                             |
| JJA         | June–July–August                                             |
| NCAR        | National Center for Atmospheric Research                     |
| NOAA        | National Oceanic and Atmospheric Administration              |
| RWS         | Rossby wave source                                           |
| SST         | Sea surface temperature                                      |
| SSTAs       | SST anomalies                                                |
| SWP         | Subtropical western Pacific                                  |
| SWPCGA      | SWP clockwise gyre anomaly                                   |
| TCC         | Temporal correlation coefficient                             |
| TIO         | Tropical Indian Ocean                                        |
| TP          | Tibetan Plateau                                              |
| WVT         | Water vapor transport                                        |
| WVT_div     | WVT-associated divergence                                    |

45

46

47

48

49

50

51

52

53

54

55

56

57

58

59

60

61

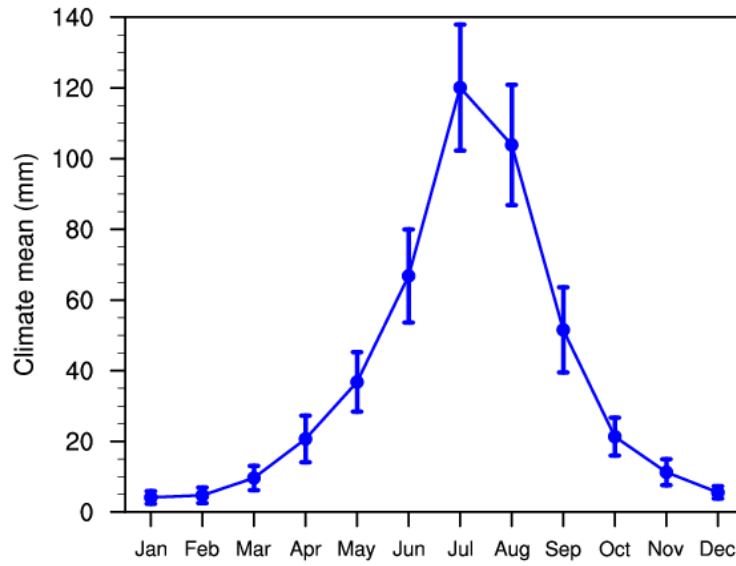

62

63 **Figure S1.** Annual cycle of the climatological-mean (1901–2014) EAMBZ precipitation (mm). The error bars  
 64 denote one standard deviation from the mean. The precipitation is derived from the CRU TS3.26 precipitation  
 65 data.

66

67

68

69

70

71

72

73

74

75

76

77

78

79

80

81

82

83

84

85

86

87

88

89

90

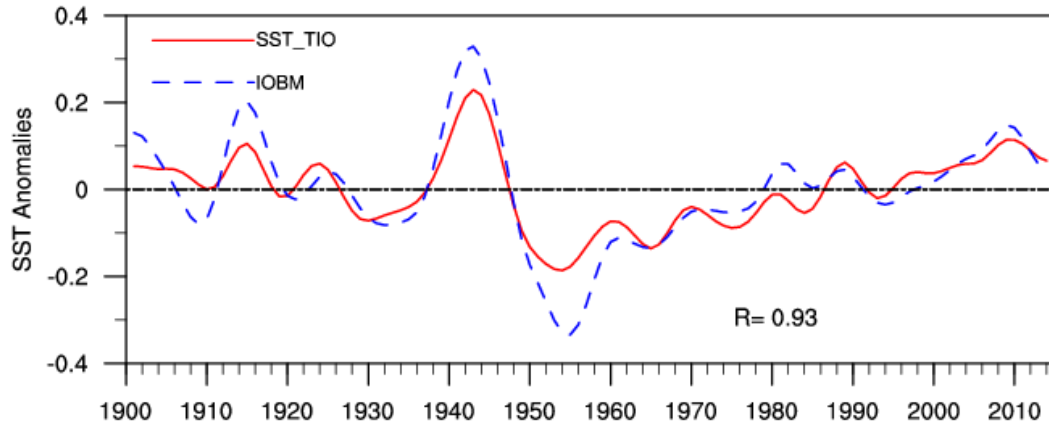

91  
92  
93  
94  
95  
96  
97  
98  
99  
100  
101  
102

**Figure S2.** Time-evolving observed summertime SSTAs over the narrower TIO domain for defining  $I_{IOBM}$  (20°S–20°N, 40°E–100°E; blue line) and SSTAs over the broader TIO domain in CESM1\_IOPES (15°S–15°N, 40°E–174°E; red line) from 1901–2014. The time series are detrended and 11-year low-pass filtered. The numeral at the bottom represents the TCC between the corresponding time series. The base period for calculating SSTAs is 1901–2014. The areal mean SSTAs are calculated based on the ERSSTv5.

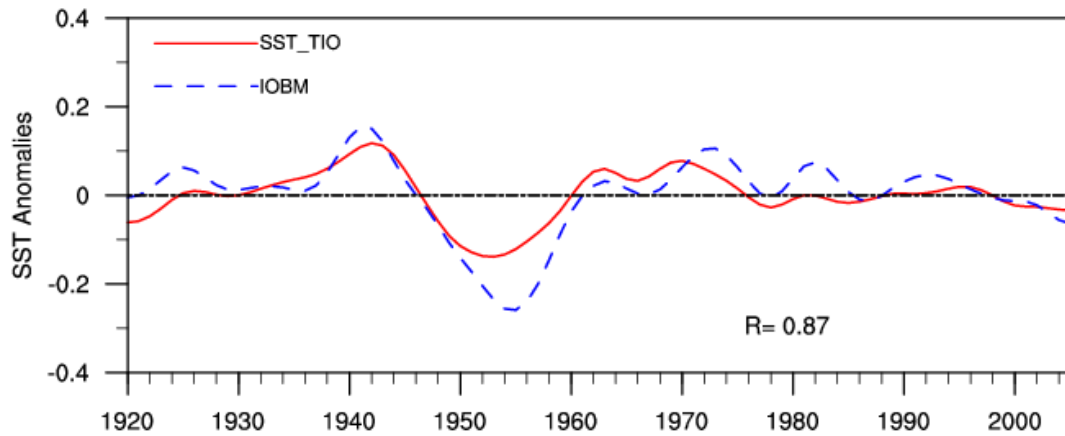

103  
104  
105  
106  
107  
108  
109  
110  
111  
112  
113  
114

**Figure S3.** Time-evolving simulated summertime SSTAs over the narrower TIO domain for defining  $I_{IOBM}$  (20°S–20°N, 40°E–100°E; blue line) and SSTAs over the broader TIO domain in CESM1\_IOPES (15°S–15°N, 40°E–174°E; red line) from 1920–2005. The time series are detrended and 11-year low-pass filtered. The numeral at the bottom represents the TCC between the corresponding time series. The areal mean SSTAs are calculated based on the difference between the CESM1\_IOPES ensemble mean and the CESM1\_LENS ensemble mean (former minus latter).

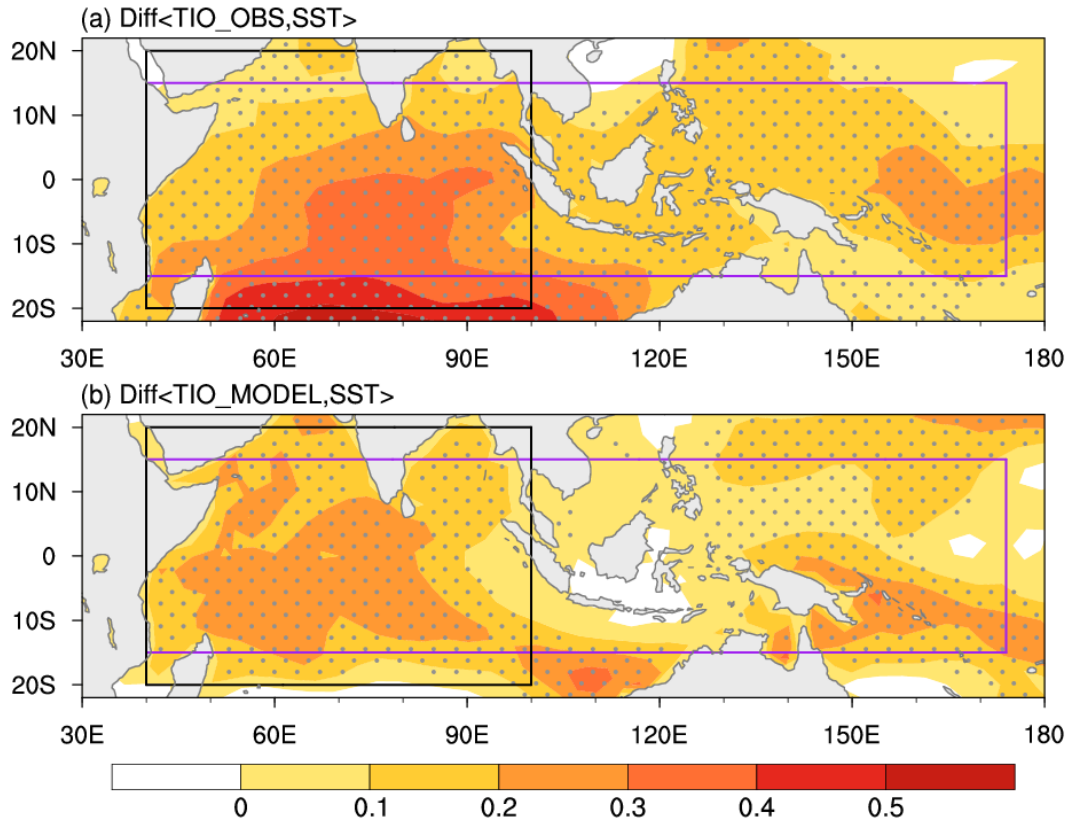

115

116 **Figure S4.** Composite differences of (a) observed and (b) simulated JJA-mean SST (°C) between warm and cold  
 117 SST years over the broader TIO domain in CESM1\_IOPES (15°S–15°N, 40°E–174°E; purple box). In panel (a), the  
 118 warm and cold TIO SST years are selected based on the  $\pm 0.5$  standard deviations of the observed time-evolving  
 119 SSTAs during 1901–2014, as shown in Fig. S2 (red line). In panel (b), the warm and cold TIO SST years are  
 120 selected based on the  $\pm 0.5$  standard deviations of the simulated time-evolving SSTAs during 1920–2005, as shown  
 121 in Fig. S3 (red line). The black frame (20°S–20°N, 40°E–100°E) outlines the domain for delineating the IOBM  
 122 mode (the same hereinafter). All variables are detrended and 11-year low-pass filtered. Areas with significant  
 123 values exceeding the 95% confidence level are dotted. The observed SSTAs are derived from the ERSSTv5; whilst  
 124 the simulated SSTAs are calculated based on the difference between the CESM1\_IOPES ensemble mean and the  
 125 CESM1\_LENS ensemble mean (former minus latter), highlighting the internally driven impacts of TIO SSTAs.

126

127

128

129

130

131

132

133

134

135

136

137

138

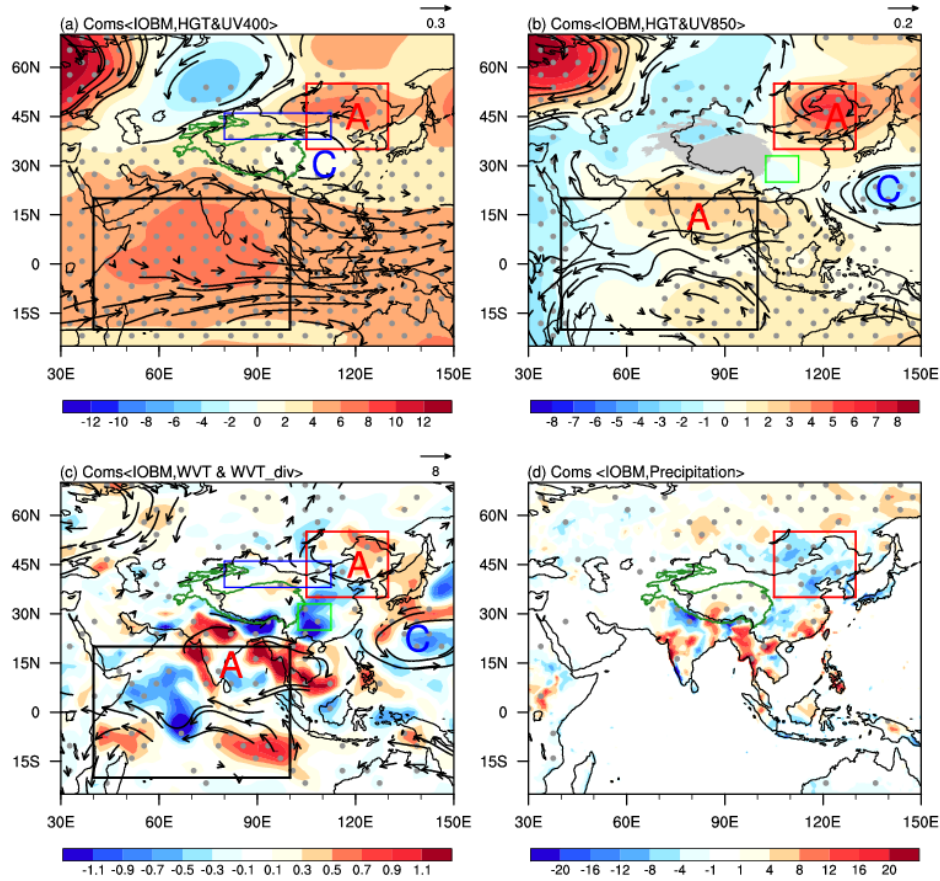

139

140 **Figure S5.** Composite anomalies of JJA-mean (a) Z400 (shading; m) and UV400 (vectors; m s<sup>-1</sup>), (b) Z850  
 141 (shading; m) and UV850 (vectors; m s<sup>-1</sup>), (c) <WVT> (vectors; kg m<sup>-1</sup> s<sup>-1</sup>) and <WVT\_div> (shading; 10<sup>-5</sup> kg m<sup>-2</sup>  
 142 s<sup>-1</sup>), and (d) precipitation (mm month<sup>-1</sup>) during the warm phase years of the IOBM. All variables are detrended  
 143 and 11-year low-pass filtered. Areas with significant values of Z400, Z850, and <WVT\_div> that exceed the 95%  
 144 confidence level are stippled, respectively. Only vectors that are significant at the 95% confidence level are shown.  
 145 The base period is 1901–2014. The warm phase years of the IOBM are selected based on the 0.5 standard  
 146 deviations of the observed time-evolving SSTAs during the based period, as shown in Fig. 6b (blue line). The  
 147 precipitation is derived from the CRU TS3.26 precipitation data; whilst other variables are from the 20CRv2c  
 148 datasets.

149

150

151

152

153

154

155

156

157

158

159

160

161

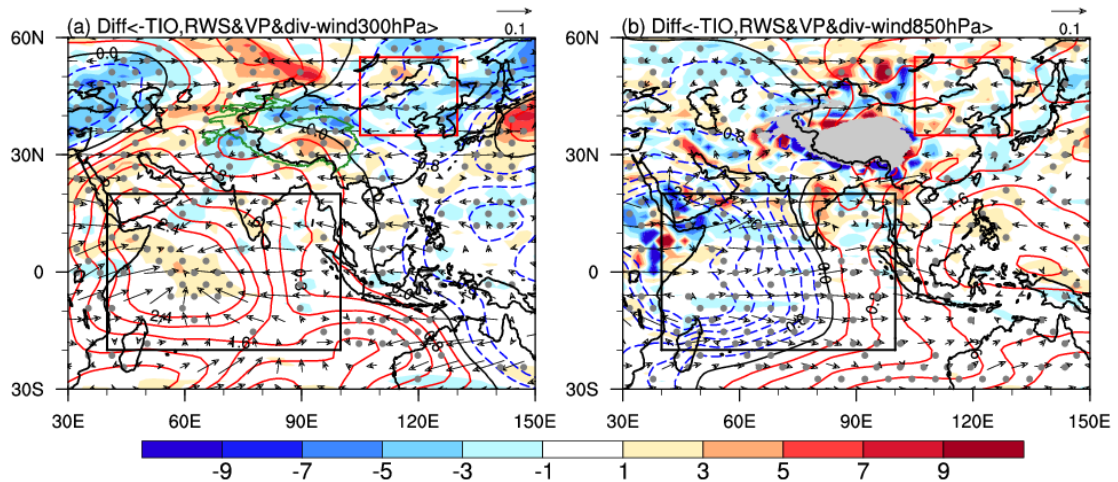

162

163 **Figure S6.** Simulated composite differences of JJA-mean (a) 300- and (b) 850-hPa RWS (shading;  $10^{-11} \text{ s}^{-2}$ ),  
 164 velocity potential (contours; interval: 0.8;  $10^5 \text{ m}^2 \text{ s}^{-1}$ ), and divergent horizontal wind (vectors;  $\text{m s}^{-1}$ ) between cold  
 165 and warm SST years over the broader TIO domain in CESM1\_IOPES ( $15^\circ \text{S}$ – $15^\circ \text{N}$ ,  $40^\circ \text{E}$ – $174^\circ \text{E}$ ; purple box in Fig.  
 166 S4). The warm and cold TIO SST years are selected based on the  $\pm 0.5$  standard deviations of the simulated  
 167 time-evolving SSTAs during 1920–2005, as shown in Fig. S3 (red line). All variables are detrended and 11-year  
 168 low-pass filtered. Areas with significant values of RWS exceeding the 95% confidence level are stippled. Only  
 169 vectors that are significant at the 95% confidence level are shown. The simulated anomalies of RWS, velocity  
 170 potential, and divergent horizontal wind are calculated based on the difference between the CESM1\_IOPES  
 171 ensemble mean and the CESM1\_LENS ensemble mean (former minus latter), highlighting the internally driven  
 172 impacts of TIO SSTAs.
